# Supplementary material
Source: HighWire-hosted journal article supplement (http://rapm.bmj.com/highwire/filestream/14547/field_highwire_adjunct_files/0/rapm-2020-102154supp001_data_supplement.pdf)
Supplement: rapm-2020-102154supp001_data_supplement.pdf [file rapm-2020-102154supp001_data_supplement.pdf]

## Supplementary File 1

| #         | Searches                                                                                                                                                                                                                                                                                                                                                                                                                                                                                                                                                          | Results      |
|-----------|-------------------------------------------------------------------------------------------------------------------------------------------------------------------------------------------------------------------------------------------------------------------------------------------------------------------------------------------------------------------------------------------------------------------------------------------------------------------------------------------------------------------------------------------------------------------|--------------|
| 1         | exp anesthesia, epidural/ or anesthesia, spinal/ or anesthesia, obstetrical/ or analgesia, epidural/                                                                                                                                                                                                                                                                                                                                                                                                                                                              | 38154        |
| 2         | *nerve block/ae or *autonomic nerve block/ae                                                                                                                                                                                                                                                                                                                                                                                                                                                                                                                      | 1511         |
| 3         | spinal cord stimulation/                                                                                                                                                                                                                                                                                                                                                                                                                                                                                                                                          | 980          |
| 4         | epidur*.tw,kf. and an?esthe*.mp,jw.                                                                                                                                                                                                                                                                                                                                                                                                                                                                                                                               | 22814        |
| 5         | (epidurals or spinal).tw,kf.                                                                                                                                                                                                                                                                                                                                                                                                                                                                                                                                      | 741          |
| 6         | ((regional or spinal* or caudal or neurax* or neuroax* or extradur* or peridur* or dural or intrathec*) adj6 an?esth*) or ((subarach* or sub-arach*) adj an?esth*).tw,kf.                                                                                                                                                                                                                                                                                                                                                                                         | 30074        |
| 7         | ((regional or spinal* or neurax* or neuroax* or epidural or extradur* or peridur* or dural or intrathec*) adj3 analg*).tw,kf.                                                                                                                                                                                                                                                                                                                                                                                                                                     | 12481        |
| 8         | (exp injections, spinal/ or spinal puncture/ or post-dural puncture headache/ or (((epidur* or neurax* or neuroax* or extradur* or peridur* or dural or postdural or intrathec*) adj2 (cathet* or inject* or punct* or technique*))).tw,kf. or ((catheters, indwelling/ae or catheterization/ae) and epidural space/)) and (an?est* or analg* or neuralg* or palliat* or pain or adrenal cortex horm* or steroid* or corticoster* or gl#cocortic* or hydrocort* or methylpredn* or predniso* or dexamet* or opioid* or morphin* or morpholin* or fentanyl).mp,jw. | 21410        |
| 9         | ((epidur* or neurax* or neuroax* or extradur* or peridur* or intrathec* or central nerv*) adj3 block*).tw,kf.                                                                                                                                                                                                                                                                                                                                                                                                                                                     | 4413         |
| 10        | ((obstetric* or labo?r) adj an?est*).tw,kf.                                                                                                                                                                                                                                                                                                                                                                                                                                                                                                                       | 2493         |
| 11        | spinal cord stimulat*.tw,kf.                                                                                                                                                                                                                                                                                                                                                                                                                                                                                                                                      | 3307         |
| <b>12</b> | <b>or/1-11 [epidural anesthesia]</b>                                                                                                                                                                                                                                                                                                                                                                                                                                                                                                                              | <b>81584</b> |
| 13        | intracranial hemorrhages/ or hematoma, epidural, cranial/ or hematoma, subdural, intracranial/ or cerebral hemorrhage/ or cerebral hemorrhage, traumatic/ or intracranial hemorrhage, traumatic/                                                                                                                                                                                                                                                                                                                                                                  | 43255        |
| 14        | brain abscess/                                                                                                                                                                                                                                                                                                                                                                                                                                                                                                                                                    | 7705         |
| 15        | (abscess/ or hematoma/) and (dura mater/ or brain/ or brain diseases/ or cerebellar diseases/)                                                                                                                                                                                                                                                                                                                                                                                                                                                                    | 1967         |

|    |                                                                                                                                                                                                                                                                                                                                                                                                                                                                                                                                                                                                                                                                                                                                                                                                                                                                                                                                                     |                |
|----|-----------------------------------------------------------------------------------------------------------------------------------------------------------------------------------------------------------------------------------------------------------------------------------------------------------------------------------------------------------------------------------------------------------------------------------------------------------------------------------------------------------------------------------------------------------------------------------------------------------------------------------------------------------------------------------------------------------------------------------------------------------------------------------------------------------------------------------------------------------------------------------------------------------------------------------------------------|----------------|
| 16 | (hematoma, subdural/ or hematoma, subdural, acute/ or hematoma, subdural, chronic/ or epidural abscess/ or subarachnoid hemorrhage/) not (((spinal or intraspinal or interspin* or paraspin* or vertebra* or interverteb* or lumbar or sacral or caudal or cervical) adj (h?ematom* or absces* or bleed* or h?emorrhag*)) or ((spinal or intraspinal or interspin* or paraspin* or vertebra* or interverteb* or lumbar or sacral or caudal or cervical) adj (epidur* or peridur* or extradur* or subdur* or intradur* or subarachnoid* or sub-arachnoid*) adj1 (h?ematom* or absces* or bleed* or h?emorrhag*))).tw. not (intracrani* or crani* or cerebra* or cerebel* or cerebrovascul* or cerebro-vascul* or brain* or intracereb* or hemispher* or interhemisph* or pariet*occipit* or front*parietal or occipital or temp*pariet* or parietal or posterior fossa or corpus callosum or intracortic* or periventricul* or intraventricul*).mp.) | 29570          |
| 17 | (encephalor?hag* or h?ematencephalo* or ((intracrani* or crani* or cerebra* or cerebel* or cerebrovascul* or cerebro-vascul* or brain* or intracereb* or hemispher* or interhemisph* or pariet*occipit* or front*parietal or occipital or temp*pariet* or parietal or posterior fossa or corpus callosum or intracortic* or periventricul* or intraventricul*) adj5 (h?ematom* or h?emorrhag* or microh?emorrhag* or bleed* or microbleed* or absces*))).tw,kf.                                                                                                                                                                                                                                                                                                                                                                                                                                                                                     | 72069          |
| 18 | ((epidur* or peridur* or extradur* or subdur* or intradur* or subarachnoid* or sub-arachnoid*) adj1 (h?ematom* or h?emorrhag* or bleed* or absces*)).tw,kf. not (((spinal or intraspinal or interspin* or paraspin* or vertebra* or interverteb* or lumbar or sacral or caudal or cervical) adj (epidur* or peridur* or extradur* or subdur* or intradur* or subarachnoid* or sub-arachnoid*) adj1 (h?ematom* or h?emorrhag* or bleed* or absces*)).tw,kf. not (intracrani* or crani* or cerebra* or cerebel* or cerebrovascul* or cerebro-vascul* or brain* or intracereb* or hemispher* or interhemisph* or pariet*occipit* or front*parietal or occipital or temp*pariet* or parietal or posterior fossa or corpus callosum or intracortic* or periventricul* or intraventricul*).mp.)                                                                                                                                                           | 39633          |
| 19 | <b>or/13-18</b> [cranial hematomas & abscesses]                                                                                                                                                                                                                                                                                                                                                                                                                                                                                                                                                                                                                                                                                                                                                                                                                                                                                                     | <b>120084</b>  |
| 20 | <b>12 and 19</b> [epidurals and cranial hematomas & abscesses]                                                                                                                                                                                                                                                                                                                                                                                                                                                                                                                                                                                                                                                                                                                                                                                                                                                                                      | <b>1498</b>    |
| 21 | <b>exp animals/ not humans/</b> [animal filter]                                                                                                                                                                                                                                                                                                                                                                                                                                                                                                                                                                                                                                                                                                                                                                                                                                                                                                     | <b>4696997</b> |
| 22 | <b>20 not 21</b> [epidurals and cranial hematomas & abscesses in humans]                                                                                                                                                                                                                                                                                                                                                                                                                                                                                                                                                                                                                                                                                                                                                                                                                                                                            | <b>1455</b>    |
| 23 | <b>remove duplicates from 22</b> [epidurals and cranial hematomas & abscesses in humans - deduplicated]                                                                                                                                                                                                                                                                                                                                                                                                                                                                                                                                                                                                                                                                                                                                                                                                                                             | <b>1449</b>    |

Supplementary File Table 1. Search strategy. Database(s): Ovid MEDLINE(R) Epub Ahead of Print, In-Process & Other Non-Indexed Citations, Ovid MEDLINE(R) Daily and Ovid MEDLINE(R) 1946 to Present.  
Search Strategy: 2020-05-11
